# Supplementary material for: The Justinianic Plague: An inconsequential pandemic?
Source: PubMed Central journal article supplement — Proc Natl Acad Sci U S A. 2019 Dec 2;116(51):25546–54. doi: 10.1073/pnas.1903797116 (PMC6926030; doi:10.1073/pnas.1903797116), 2019-12-02
Supplement: pnas.1903797116.sapp.pdf [file pnas.1903797116.sapp.pdf]

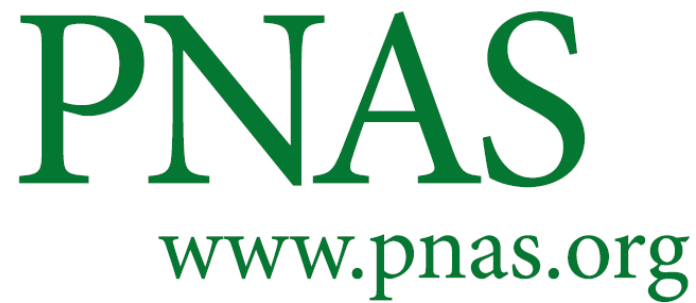

## Supplementary Information for

### The Justinianic Plague: An inconsequential pandemic?

Lee Mordechai, Merle Eisenberg, Timothy P. Newfield, Adam Izdebski, Janet E. Kay, Hendrik Poinar

Correspondence to: [lee.mordechai@mail.huji.ac.il](mailto:lee.mordechai@mail.huji.ac.il)

#### **This PDF file includes:**

Materials and Methods  
Supplementary Text  
Figs. S1 to S6  
Tables S1 to S2

## Materials and Methods

### Fig. 1

The spatiotemporal contours of outbreaks are all summarized from Stathakopoulos' catalog (1). The authors read and analyzed every historical text listed in the catalog, and considered how the sources that mention plague described it. All these texts were compiled during and after the 6<sup>th</sup> century; many of them are non-contemporary, written sometimes more than a hundred years after the events they describe. We removed a few from consideration, since they did not directly discuss an epidemic. In contrast to Stathakopoulos, we did not include epigraphic (inscription) evidence since we discuss this type of data elsewhere, and it is, for the Justinianic Plague and first plague pandemic, indirect and rather inconsequential. Likewise, we did not include the modern secondary research Stathakopoulos listed in place of some Arabic texts because it is qualitatively different from ancient texts. Finally, we did not include the Arabic texts written centuries after the events they describe because of their complex and under-researched transmission and connection to plague (e.g. several sources copy the same plague episode from each other). These biases have similarly prevented the use of these sources in most previous JP research. We marked each of the 'waves' that had such an Arabic source discussion with a '+' in the supplementary table below.

To determine the certainty that the reported outbreak was referring to plague, we devised a three-level scale. In our analysis, represented in Fig. 1 and in the table below, 'A' level refers to texts that discuss plague symptoms in any detail. In summary, this meant whether they mentioned the buboes often associated with plague along with any additional symptoms. A certainty level of 'B' refers to texts that note a single symptom that can be associated with plague (e.g. buboes). The 'C' certainty level refers to texts that use general terminology to discuss a mortality, disease or epidemic, but that provide no evidence that the outbreak was necessarily plague and not some other disease.

For each text in our final analysis, we calculated the number of words employed to report a plague (or another epidemic) across texts. We erred on the inclusive side, even when this entailed including sections that are not necessarily about plague, but discussed a disease outbreak and, in the past, had been linked to plague outbreaks. In a few cases with higher word counts (listed below) or when we had no easy way to tally the number of words used, we averaged the words per line or per page. Thus, the numbers listed in the table are, at times, approximations, but within an acceptable margin of error. For the single text in Ge'ez (a language from East Africa, 15 words) we used the English translation instead of the original language.

Using the supplementary tables below, we counted the median word count for each plague description.

To calculate the number of Greek authors we used the *Thesaurus Linguae Graecae* (2), a near-comprehensive dataset of Greek sources before 1453 CE. Our reported number of authors is based on their 'Authors by century' chart after excluding "Long Ranges" and "Varia and Incerta". To calculate the number of Latin authors, we consulted a comprehensive dataset of all written Latin sources from this period in the *Clavis Patrum Latinorum* (3) and counted only authors who wrote during the sixth century. We included law codes, monastic rules, and

penitentials in the calculation that could be dated to the sixth century, the first and allegedly most demographically ruinous century of the Justinianic Plague. We excluded all dubious, spurious, pseudo, and anonymous materials, which would have increased the total number of sources and correspondingly lowered the percentage of plague mentions. Finally, we excluded all 35 saints' lives that *Clavis Patrum Latinorum* dated to the sixth century, since there was a significant chance of overlap in authorship between the lives and other written sources.

In the following table, the first three columns show the temporal, spatial, and textual aggregation of the results, suggesting many catastrophic outbreaks. The last two columns tally the total word count in the plague descriptions of that wave, and the median word count different plague sources have for the same wave. We chose median as our measure of central tendency to avoid the high outliers distorting our results.

Supplementary Table 1 – A summary of JP ‘waves’ in the historical texts (data underlying Fig. 1). ‘Waves’ follow Stathakopoulos’ division. Note: the information in the last three columns is sometimes duplicated between ‘waves’ (Data: 1).

| Wave | Dates   | Occurrence area                                                                                       | Number of historical texts that refer to plague | Total word count in plague descriptions | Median word count in plague descriptions |
|------|---------|-------------------------------------------------------------------------------------------------------|-------------------------------------------------|-----------------------------------------|------------------------------------------|
| 1    | 541-544 | Egypt, Asia Minor, Palestine, Syria, Italy, Sicily, North Africa, Illyricum (modern Croatia), Algeria | 15                                              | 9704                                    | 115                                      |
| 2    | 558-561 | Constantinople, southern Asia Minor                                                                   | 4                                               | 2832                                    | 183.5                                    |
| 3    | 571-574 | Italy, France, Constantinople, “the East”(?)                                                          | 7                                               | 497                                     | 25                                       |
| 4    | 590-592 | Cities in northern/central Italy, Antioch (modern Antakya)                                            | 5                                               | 2120                                    | 290                                      |
| 5    | 597-601 | Greece, Turkey, Syria, Italy, North Africa                                                            | 7                                               | 2754                                    | 24                                       |
| 6    | 618-619 | Constantinople, Alexandria                                                                            | 5                                               | 819                                     | 74                                       |
| 7    | 626-628 | Palestine, Persia                                                                                     | 1+                                              | 11                                      | 11                                       |
| 8    | 639     | Syria, Palestine, Iraq                                                                                | 2+                                              | 17                                      | 8.5                                      |

|    |                     |                                                                                                        |                    |      |     |
|----|---------------------|--------------------------------------------------------------------------------------------------------|--------------------|------|-----|
| 9  | 669-673             | Egypt, Israel, Kufa (in Iraq)                                                                          | 2+                 | 11   | 5.5 |
| 10 | 680                 | Rome and Pavia<br>(northern/central Italy)                                                             | 2                  | 218  | 109 |
| 11 | 687-690             | Syria, Egypt, Basra (Iraq)                                                                             | 1+                 | 800  | 800 |
| 12 | 698-700             | Iraq, Syria, Mesopotamia,<br>Constantinople                                                            | 3                  | 56   | 20  |
| 13 | 704-706             | Syria, Iraq, Basra, Kufa, Wasit<br>(Iraq)                                                              | 2+                 | 44   | 22  |
| 14 | 713-715             | Syria, Egypt                                                                                           | 4                  | 72   | 13  |
| 15 | 718-719             | Iraq, Syria                                                                                            | secondary<br>works | n/a  | n/a |
| 16 | 724-726             | Egypt, Syria, Mesopotamia                                                                              | 6+                 | 208  | 11  |
| 17 | 732-735             | Syria, Egypt, Palestine, Iraq                                                                          | 2                  | 16   | 8   |
| 18 | 743-750<br>(or 768) | Egypt, North Africa,<br>Mesopotamia, Syria, Italy,<br>Sicily, Greece, Iraq,<br>Constantinople, Armenia | 11                 | 3801 | 160 |

The following table provides additional details. Here ‘wave’ refers to the outbreaks proposed by Stathakopoulos (*I*). ID refers to the entry in his catalog. References are the documents Stathakopoulos lists in each entry. ‘Symptom details’ refers to the level of detail in which the source describes plague (A: Description of detailed plague symptoms [reference to buboes and additional info]; B: Description of minimal plague symptoms [reference to buboes or equivalent only]; C: Description with no symptoms [generic disease/mortality]). The level of detail was ranked separately by two authors (L.M. and M.E.), who then compared their ratings and discussed any differences. In cases where the same text appears multiple times within the same ‘wave’, we chose to include only the highest rating.

Supplementary Table 2– The Sources of Plague (details of previous table).

| Wave | ID  | Reference           | Symptom details | Word count                      | Comments |
|------|-----|---------------------|-----------------|---------------------------------|----------|
| 1    | 102 | Procopius Wars 2.22 | A               | 2110 ( <i>counted in #111</i> ) |          |

|   |     |                                                                                                                |     |                                 |                                                                                                                                                                                                                                             |
|---|-----|----------------------------------------------------------------------------------------------------------------|-----|---------------------------------|---------------------------------------------------------------------------------------------------------------------------------------------------------------------------------------------------------------------------------------------|
| 1 | 103 | John of Ephesus, Frag. E (229) = Pseudo-Dionysius of Tel Mahre 77                                              | A   | <i>total counted in #111</i>    |                                                                                                                                                                                                                                             |
| 1 | 103 | epigraphic material from Gaza, Nessana, Rehovot, Eboda                                                         | n/a | n/a                             | inscriptions                                                                                                                                                                                                                                |
| 1 | 104 | Procopius Wars 2.22                                                                                            | A   | 2110 ( <i>counted in #111</i> ) |                                                                                                                                                                                                                                             |
| 1 | 104 | John of Ephesus, Frag. E (229) = Pseudo-Dionysius of Tel Mahre 77, 80                                          | A   | <i>total counted in #111</i>    |                                                                                                                                                                                                                                             |
| 1 | 104 | Chronicle of Seert I, 32 in PO 7, 185                                                                          | A   | 490                             | Correct reference is II.32, pp. 182-86                                                                                                                                                                                                      |
| 1 | 104 | Michael the Syrian II 235-8                                                                                    | A   | 1600                            | Counts for Michael the Syrian must be impressionistic since he exists only in unedited manuscript form. We used an average of 500 words/page, and included the theological explanation for plague that is an important part of the chapter. |
| 1 | 105 | Cyril of Scythopolis, Vita of Kyriakos 10 (229)                                                                | C   | 40                              |                                                                                                                                                                                                                                             |
| 1 | 106 | J. Koder, Ein inschriftlicher Beleg zur justinianischen Pest in Zora; <i>Byzantinoslavica</i> 56 (1995) 13-18. | n/a | n/a                             | inscription                                                                                                                                                                                                                                 |
| 1 | 107 | Vita of Symeon Stylites the Younger 69 (I 59-60)                                                               | A   | 165                             |                                                                                                                                                                                                                                             |
| 1 | 108 | Evagrius 4.29                                                                                                  | A   | 598                             |                                                                                                                                                                                                                                             |
| 1 | 109 | Zacharias Rhetor, Fragment Ch. IX (II 129-130)                                                                 | A   | 112                             |                                                                                                                                                                                                                                             |
| 1 | 109 | Leontios of Neapolis, Vita of Symeon Salos, 151                                                                | C   | 115                             |                                                                                                                                                                                                                                             |
| 1 | 110 | Vita of Nikolas of Sion (ed. Anrich), 52 (40-41)                                                               | A   | 123                             |                                                                                                                                                                                                                                             |
| 1 | 111 | Procopius Wars 2.22-23                                                                                         | A   | 2110                            | Main count for Procopius                                                                                                                                                                                                                    |
| 1 | 111 | John of Ephesus (frags. F-G) = Ps. Dion. Tel Mahre, 74-93                                                      | A   | 4140                            | Total count for John of Ephesus, estimated count based on multiplying the average number of words on the page.                                                                                                                              |
| 1 | 111 | Malalas 482                                                                                                    | C   | 83                              |                                                                                                                                                                                                                                             |
| 1 | 111 | Theophanes 6034                                                                                                | C   | 13                              |                                                                                                                                                                                                                                             |
| 1 | 112 | Vita of Theodore of Sykeon 8 (I 7-8)                                                                           | B   | 89                              |                                                                                                                                                                                                                                             |

|   |     |                                                                                                                                                                     |     |      |                                                                                                                                                                     |
|---|-----|---------------------------------------------------------------------------------------------------------------------------------------------------------------------|-----|------|---------------------------------------------------------------------------------------------------------------------------------------------------------------------|
| 1 | 114 | Victor of Tunnuna, <i>Chronica</i> , ed. Mommsen ( <i>MGH AA 11=Chronica Minora saec. IV-VII/2</i> ) ad a. 542 (201)                                                | B   | 15   |                                                                                                                                                                     |
| 1 | 115 | Manganaro, <i>Byzantina Siciliae, Minima Epigraphica et Papyrologica 4</i> (2001), p. 133                                                                           | n/a | n/a  | inscription                                                                                                                                                         |
| 1 | 116 | Marcellinus Comes ad a. 543 (107)                                                                                                                                   | C   | 11   |                                                                                                                                                                     |
| 1 | 117 | N. Duval, <i>Nouvelles recherches d'archeologie et d'epigraphie chretienne a Sufetula (Byzacene), Melanges d'archeologie de l'ecole francaise de Rome 68</i> (1956) | n/a | n/a  | inscription                                                                                                                                                         |
| 1 | 118 | I.B. de Rossi et al. eds., <i>Inscriptiones Christianae Urbis Romae septimo seculo antiquiores</i> , Nova Series (=ICUR NS), 10 volumes; Rome 1922-1992.            | n/a | n/a  | inscription                                                                                                                                                         |
| 2 | 134 | Agathias 5.10                                                                                                                                                       | A   | 322  |                                                                                                                                                                     |
| 2 | 134 | Malalas 489                                                                                                                                                         | B   | 32   |                                                                                                                                                                     |
| 2 | 134 | Theophanes 6050                                                                                                                                                     | B   | 31   |                                                                                                                                                                     |
| 2 | 136 | Theophanes 6053                                                                                                                                                     | C   | 14   |                                                                                                                                                                     |
| 2 | 136 | Vita of Symeon Stylites the Younger 126-129                                                                                                                         | C   | 2433 |                                                                                                                                                                     |
| 2 | 136 | The Seventh Century in the West Syrian Chronicles 15                                                                                                                | n/a | n/a  | Based on this reference, Palmer 15 is the Edessene Apocalyptic Fragment, which probably should not have been included, since it does not explicitly mention plague. |
| 3 | 144 | Marius of Avenches 571 (238)                                                                                                                                        | B   | 25   |                                                                                                                                                                     |
| 3 | 144 | Gregory of Tours, <i>History of the Franks</i> , 4.31 in MGH version                                                                                                | A   | 334  |                                                                                                                                                                     |
| 3 | 145 | John of Bicclair 572-3 (213-14)                                                                                                                                     | B   | 26   |                                                                                                                                                                     |
| 3 | 145 | <i>Chronicon</i> ad 846, 174                                                                                                                                        | B   | 10   |                                                                                                                                                                     |
| 3 | 145 | Agapios 437                                                                                                                                                         | C   | 12   |                                                                                                                                                                     |
| 3 | 145 | Michael the Syrian II 309-310                                                                                                                                       | B   | 75   |                                                                                                                                                                     |
| 3 | 145 | John of Nikiu XCIV 18                                                                                                                                               | C   | 15   | Ge'ez, we used word count from an English translation                                                                                                               |

|   |     |                                                                          |     |      |                                                                                                                     |
|---|-----|--------------------------------------------------------------------------|-----|------|---------------------------------------------------------------------------------------------------------------------|
| 4 | 151 | Liber Pontificalis 65 (I 309)                                            | n/a | n/a  | The reference says nothing about plague or the cause of death for Pelagius, which is suggested as plague elsewhere. |
| 4 | 151 | Gregory of Tours, History of the Franks 10.1                             | B   | 43   |                                                                                                                     |
| 4 | 151 | Gregory the Great, Dialogues 3.19.1-2                                    | n/a | n/a  | This reference mentions a flood, but not the plague.                                                                |
| 4 | 151 | Gregory the Great, Dialogues 4.18.2                                      | C   | 164  |                                                                                                                     |
| 4 | 151 | Gregory the Great, Dialogues 4.27.6                                      | C   | 552  |                                                                                                                     |
| 4 | 151 | Gregory the Great, Dialogues 4.37.7                                      | C   | 368  |                                                                                                                     |
| 4 | 151 | Gregory the Great, Dialogues 4.40.3                                      | n/a | n/a  |                                                                                                                     |
| 4 | 151 | Paul the Deacon, Hist. Lang. 3.23-34 (127-128)                           | B   | 213  |                                                                                                                     |
| 4 | 154 | Gregory the Great, Register Epis. Vol 1, 2.2 (90-91)                     | C   | 105  |                                                                                                                     |
|   | 154 | Paul the Deacon, Hist. Lang. 4.4 (145-6)                                 | B   | 77   |                                                                                                                     |
| 4 | 155 | Evagrius 4.29 (178, 11-16)                                               | A   | 598  |                                                                                                                     |
| 5 | 156 | Miracles of St. Demetrios 29-46 (I 57-82)                                | A   | 2426 | Estimated length                                                                                                    |
| 5 | 159 | Theophylact Simocatta 7.15.2                                             | A   | 51   |                                                                                                                     |
| 5 | 160 | Michael the Syrian 2.373-374                                             | B   | 24   |                                                                                                                     |
| 5 | 160 | Chronicon ad 1234, 171                                                   | C   | 12   | Included but uncertain plague identification                                                                        |
| 5 | 161 | Elias of Nisibis 911 AG (60)                                             | B   | 16   | Used Arabic version                                                                                                 |
| 5 | 162 | Gregory the Great, Register epis. 9.232 (814-5)                          | C   | 171  | Included but uncertain plague identification                                                                        |
|   | 162 | Gregory the Great, Register epis. 10.20 (850-1)                          | C   | 32   | Included but uncertain plague identification                                                                        |
| 5 | 163 | Paul the Deacon, Hist. Lang. 4.14 (150-51)                               | C   | 14   |                                                                                                                     |
| 5 | 164 | Paul the Deacon, Hist. Lang. 4.14 (150-51); copied by Agnellus 101 (386) | C   | 8    |                                                                                                                     |
| 6 | 173 | Nikephoros, Short History 8, 12 (48, 54)                                 | C   | 27   |                                                                                                                     |
| 6 | 173 | George the Monk, Chronicle 669                                           | C   | 28   |                                                                                                                     |
| 6 | 173 | Miracles of St. Artemios, 34 (52)                                        | A   | 540  |                                                                                                                     |

|    |     |                                                                                                                                                           |     |           |                                                         |
|----|-----|-----------------------------------------------------------------------------------------------------------------------------------------------------------|-----|-----------|---------------------------------------------------------|
| 6  | 175 | Leontios, Life of John the Almsgiver 24 (375)                                                                                                             | C   | 74        |                                                         |
| 7  | 175 | Anonymous, Life of John of Almsgiver, 37 (53)                                                                                                             | C   | 150       | Estimated length                                        |
| 7  | 177 | Michael the Syrian 2.412                                                                                                                                  | B   | 11        |                                                         |
| 7  | 178 | Secondary sources: von Kremer, Seuchen 107; Dols, Plague, 376; Conrad, Plague 159-163; Conrad, Plague Chronologies, 62, 68, 79; Treadgold, History, 298-9 | n/a | secondary | See discussion above about problems with Arabic sources |
| 8  | 180 | Elias of Nisibis AH 18 (64)                                                                                                                               | C   | 8         | Used Arabic version                                     |
| 8  | 180 | Michael the Syrian II.431                                                                                                                                 | B   | 9         |                                                         |
| 8  | 180 | "Arabic sources": Conrad, Plague, 167-246.                                                                                                                | n/a | secondary | See discussion above about problems with Arabic sources |
| 9  | 185 | Secondary sources: von Kremer, Seuchen, 108; Conrad, Plague, 250-3; Conrad, Plague Chronologies, 62, 82                                                   | n/a | secondary | See discussion above about problems with Arabic sources |
| 9  | 186 | Theophanes 6164                                                                                                                                           | C   | 5         |                                                         |
| 9  | 186 | Agapios 492                                                                                                                                               | C   | 6         |                                                         |
| 10 | 192 | Liber Pontificalis 81.16 (I 350)                                                                                                                          | C   | 62        |                                                         |
| 10 | 192 | Paul the Deacon, Hist. Lang. 6.5 (213-214)                                                                                                                | C   | 156       |                                                         |
| 11 | 194 | John bar Penkaye, in Brock, North Mesopotamia in the late Seventh Century, 15.160-165 (68-71)                                                             | C   | 800       | Estimated based on average words per page               |
| 11 | 194 | Theophanes 6179                                                                                                                                           | n/a | n/a       | No plague mentioned here (only famine)                  |
| 11 | 194 | Elias of Nisibis AH 68 (72)                                                                                                                               | n/a | n/a       | No plague mentioned here (only famine)                  |
| 11 | 194 | Michael the Syrian II.474-5 - famine and plague                                                                                                           | n/a | n/a       | No plague mentioned here (only famine)                  |
| 11 | 195 | Secondary sources: von Kremer, Seuchen, 108-9; Conrad, Plague, 260-9; Conrad, Plague Chronologies, 55, 62, 66-7, 69-70, 82-3; Dols, Plague 379            | n/a | secondary | See discussion above about problems with Arabic sources |
| 11 | 196 | no primary; Conrad, Plague, 271-3                                                                                                                         | n/a | secondary | See discussion above about problems with Arabic sources |
| 12 | 198 | Elias of Nisibis AH 79 (74)                                                                                                                               | C   | 12        | Used Arabic version                                     |
| 12 | 199 | Theophanes 6190                                                                                                                                           | B   | 14        |                                                         |
| 12 | 199 | Nikephoros, Short History 41 (98)                                                                                                                         | C   | 16        |                                                         |



|    |     |                                                                                                                                                                                                                      |     |           |                                                                                                                                                                                                                                  |
|----|-----|----------------------------------------------------------------------------------------------------------------------------------------------------------------------------------------------------------------------|-----|-----------|----------------------------------------------------------------------------------------------------------------------------------------------------------------------------------------------------------------------------------|
| 12 | 200 | Theophanes 6192                                                                                                                                                                                                      | C   | 6         |                                                                                                                                                                                                                                  |
| 12 | 200 | Elias of Nisibis 80 AH (74)                                                                                                                                                                                          | B   | 8         | Used Arabic version                                                                                                                                                                                                              |
| 13 | 201 | Chronicle of Zuqnin, 1016 AG (148)                                                                                                                                                                                   | C   | 28        |                                                                                                                                                                                                                                  |
| 13 | 201 | Michael the Syrian II 480                                                                                                                                                                                            | C   | 16        |                                                                                                                                                                                                                                  |
| 13 | 203 | Secondary sources: von Kremer, Seuchen, 109; Conrad, Plague, 277-8; Conrad, Plague Chronologies, 55-6, 62, 68-9, 83-4; Dols, Plague 379                                                                              | n/a | secondary | See discussion above about problems with Arabic sources                                                                                                                                                                          |
| 14 | 205 | Chronicle of Disasters (AD 716 in Seventh Century in West Syrian sources) AG 1024 (45-46)                                                                                                                            | C   | 41        | This text has not, to our knowledge, been edited, since it is a fragmentary insertion in a larger text. The English translation by Brock amounts to 41 words, but we did not have access to the fragmentary original manuscript. |
| 14 | 205 | Chronicon ad 819, 1024 AG                                                                                                                                                                                            | C   | 6         |                                                                                                                                                                                                                                  |
| 14 | 205 | Michael the Syrian II.482                                                                                                                                                                                            | B   | 5         |                                                                                                                                                                                                                                  |
| 14 | 207 | Severos, History of the Patriarchs, 17 (67-68)                                                                                                                                                                       | C   | 20        |                                                                                                                                                                                                                                  |
| 15 | 209 | no primary sources; secondary are von Kremer, Seuchen, 113; Conrad, Plague, 286-8; Conrad, Plague Chronologies, 56, 85; Dols, Plague 380; Conrad, Historical Evidence and the Archaeology of Early Islam, p. 270#4-6 | n/a | secondary | See discussion above about problems with Arabic sources                                                                                                                                                                          |
| 16 | 212 | no primary sources; Conrad, plague, 289                                                                                                                                                                              | n/a | secondary | See discussion above about problems with Arabic sources                                                                                                                                                                          |
| 16 | 213 | Theophanes, 6218                                                                                                                                                                                                     | C   | 5         |                                                                                                                                                                                                                                  |
| 16 | 213 | Vita of Willibald, Bishop of Eichstatt 4 (100)                                                                                                                                                                       | C   | 157       |                                                                                                                                                                                                                                  |
| 16 | 213 | Agapios 506                                                                                                                                                                                                          | B   | 10        |                                                                                                                                                                                                                                  |
| 16 | 213 | Elias of Nisibis AH 107 (78)                                                                                                                                                                                         | B   | 12        | Used Arabic Version                                                                                                                                                                                                              |
| 16 | 213 | Chronicon ad 819, 1036 AG                                                                                                                                                                                            | B   | 10        |                                                                                                                                                                                                                                  |
| 16 | 213 | Michael the Syrian II.491                                                                                                                                                                                            | C   | 14        |                                                                                                                                                                                                                                  |
| 17 | 214 | Theophanes, 6225                                                                                                                                                                                                     | C   | 10        |                                                                                                                                                                                                                                  |
| 17 | 214 | Agapios 507                                                                                                                                                                                                          | C   | 6         | Plague reference is in 508                                                                                                                                                                                                       |
| 18 | 218 | Severos, History of the Patriarchs, 18.97, 115                                                                                                                                                                       | C   | 47        |                                                                                                                                                                                                                                  |

|    |     |                                                                                                            |   |                                |                                                                                                                    |
|----|-----|------------------------------------------------------------------------------------------------------------|---|--------------------------------|--------------------------------------------------------------------------------------------------------------------|
| 18 | 219 | Chronicle of Zuqnin 1055-6 (168-174)                                                                       | A | 1000                           | A dubious entry that is an epidemic/famine account but not necessarily bubonic plague (included); estimated length |
| 18 | 219 | Michael the Syrian II.506, 508                                                                             | C | 20                             |                                                                                                                    |
| 18 | 219 | Chronicon ad 1234, 248-249                                                                                 | C | 160                            |                                                                                                                    |
| 18 | 220 | Theophanes, 6238                                                                                           | A | 320                            |                                                                                                                    |
| 18 | 220 | Byzantine short chronicle 1, 17                                                                            | C | 108                            |                                                                                                                    |
| 18 | 220 | Letter of Pope Zacharias to St. Boniface In PL 89 Epistola X. Zachariae papae ad bonifacium archiepiscopum | C | 21                             | Included but uncertain plague identification                                                                       |
| 18 | 221 | Theophanes, 6238                                                                                           | A | 320 ( <i>counted in #220</i> ) |                                                                                                                    |
| 18 | 221 | Byzantine short chronicle 1, 17                                                                            | C | 108 ( <i>counted in #220</i> ) |                                                                                                                    |
| 18 | 221 | Byzantine short chronicle 2, 4                                                                             | B | 10                             |                                                                                                                    |
| 18 | 221 | Nikephoros, Short History 67 (138-140)                                                                     | A | 325                            |                                                                                                                    |
| 18 | 221 | Nikephoros, Antirhetikos III 496B-497A                                                                     | B | 980                            | Estimate based on 49 sentences                                                                                     |
| 18 | 221 | Theodore Studites, Laudatio Platonis PG 99, 805B-D                                                         | C | 490                            | Estimate based on 24.5 sentences                                                                                   |
| 18 | 222 | Chronicle of Zuqnin, 1061-2 (184-9)                                                                        | A | 105                            |                                                                                                                    |

Fig. 2

The Novels (Roman laws) that serve as the basis of this analysis were dated by Blume (4), Noailles (5) and Miller and Sarris (6). We harmonized the minor discrepancies between the three datasets. Following any of their respective dates would not change the results of our analysis.

Notably, only two laws (Novels 118 and 122) have been connected with the plague. Novel 118 made changes to inheritance laws and does not discuss the plague as a cause, but instead was the culmination of a long trend in inheritance law and was one of many novels about property rights (7: 96; 8: 75). Novel 122 was issued in 544 and attempted to curtail increased labor prices and, therefore, has been linked to the first plague outbreak (6: 799). Yet, this law was not issued during the most devastating first year of the outbreak in Constantinople and, moreover, the language (“the chastening that has been sent by God’s goodness”) is vague and could refer to any type of natural disaster (e.g. earthquakes) or military catastrophe (6: 799; 9: 67-8). Three laws related to burial practices (Novels 43, 59, and 60) date to several years before the plague outbreak and, therefore, burial practices do not seem to have legally changed after the plague.

Fig. 3

This dataset was compiled from the papyri.info website (10). We searched for specific years (i.e. 520 to 521 for 521), with ‘strict’ on (see website for their terminology). We also searched this dataset for words that might suggest the outbreak of the plague but found none. A potential exception is noted in Papaconstantinou (11), who comments that the key word is fragmentary and has been reconstructed, while the context suggests other possible explanations than plague deaths.

Fig. 4

This dataset used the dating proposed by Banaji (12) and Mazza (13). Banaji included exact years; in a few cases, Mazza’s dating included intervals, and we only used the documents that were dated within an interval of 3 years or less. Removing either dataset, or using only documents that date to a specific date, would not change our results.

Fig. 5

We scraped this dataset from the digital version of the IGLS (<https://inscriptions.packhum.org/>, 14). All the inscriptions from this dataset are in Greek and come from Greater Syria – modern Syria, Lebanon, Jordan, Israel, and Saudi Arabia). We included only those inscriptions dated to a specific year (i.e. annual resolution).

Fig. 6

We constructed this dataset from a series of searches in the Epigraphic Database Heidelberg (<https://edh-www.adw.uni-heidelberg.de/home>, 15), which aggregates Latin inscriptions. We searched for each decade, then verified the search results manually to include only those inscriptions with an annual resolution.

Fig. 7

We constructed this dataset from searching the Epigraphik-Datenbank Clauss / Slaby ([http://db.edcs.eu/epigr/epi.php?s\\_sprache=en](http://db.edcs.eu/epigr/epi.php?s_sprache=en), 16) database. We searched for 500-599, then included only those inscriptions with an annual resolution.

Fig. 8

This dataset was built from searching the Epigraphic Database Bari (<http://www.edb.uniba.it/about>, 17). We downloaded the results, then filtered them with a script to include only those with an annual resolution.

Fig. 9

This dataset was built from scraping individual entries in the Hispanica Epigraphica database (<http://eda-bea.es/>, 18) for their dating information, which we then aggregated in a table. We considered only inscriptions with an annual resolution.

Note for Figs. 6-9

All these collections focus on Latin inscriptions but are not always clear about their methodology and the sources they gathered their entries from (generally smaller in-print collections). Some of

the results in these datasets therefore overlap to an extent. However, this does not impact our conclusion since we consider each dataset separately and find no plague effect in any of them.

### Figs. 10-11

The pollen percentages were taken from the dataset published in Izdebski, Koloch, and Słoczyński (19). We separated the seven lines into two scales on both y-axes to increase the figures' readability. A single scale would not change the resulting analysis. The mid-sixth century was not a major watershed in any of the regions surveyed, despite claims for massive depopulation in the countryside, similar to the role the Black Death played in certain European regions several centuries later. The locations from which pollen was analyzed appear in Fig. S4 below. Regional pollen from the specific sites in each region appear in Figs. S4a-g below. Please note that following the analysis of Izdebski, Koloch, and Słoczyński (19), the trend lines are based on the spatial and temporal distribution of data points from all sites from 500 BCE-2000 CE).

### Brief analyses of regional land use trends in the period of Late Antiquity (c. 300-800 CE)

*South Greece*: significant increase in cereal pollen and parallel slight decline in pine pollen reflecting the expansion of cultivation and rural settlement under the Eastern Roman Empire (as a response to globalized trade in the Mediterranean and demand for food supplies from the newly-founded city of Constantinople). The expansion trend slows down after 600 CE and reverses into decline in cereals after 700 CE.

*West Bulgaria*: significant increase in cereal pollen in the period c. 300-500 CE. These are high-elevation sites and the results can be interpreted as intensive colonization of more marginal areas during the times of increasing insecurity in the Balkans and, at the same time, an initial phase in the development of a specialized pastoral economy that achieved its most complex state in late medieval and early modern times.

*Northwest Turkey*: decline in both cereal and pine pollen c. 300-500 CE, afterwards a contrary development: increase in cereal and pine ca 500-700 CE. Taking into account the other regional pollen curves presented in the original publication, we interpret this as initial deforestation related to the foundation and urban growth of the new nearby mega-city of Constantinople, followed by expansion of cereal cultivation in the later part of Late Antiquity (visible also in other parts of Anatolia) and woodland regrowth in higher elevation areas.

*North central Turkey*: increase in cereal pollen c. 200-450 CE (which should be interpreted as expansion of cereal cultivation, related probably to the overall demographic and economic growth in late Roman Anatolia). A subsequent decline c. 500-650 CE (major) and 650-800 CE (minimal), accompanied by a steady increase in pine pollen appears to signal major agricultural decline in this part of Anatolia due to warfare (with the Sasanians and then the Arabs) that was taking place in Eastern Anatolia and the Caucasus.

*North Greece*: increase in cereal pollen c. 300-450 CE, decline c. 450-800 CE. The increase in pine pollen c. 300-500 CE (potentially coming from higher-elevation areas, disturbed by invasions) should be interpreted together with the developments taking place in W Bulgaria. Seems to suggest increasing cultivation in the most central and secure parts of the Balkans,

which is then interrupted by the increasing disruption of the late Roman order in the Balkans in the course of the 5<sup>th</sup> and 6<sup>th</sup> c. CE.

*East Bulgaria:* these are lowland sites near the Black Sea and are therefore strongly connected to the main military/naval and trading networks of the Eastern Roman Empire. We observe a steady increase in cereal pollen c. 300-700 CE, accompanied by a decline in pine pollen – which reflects the growing importance of these areas for the feeding of the Roman army in the Danube area and for supplying grain to Constantinople. This trend ends in the late 7<sup>th</sup>/early 8<sup>th</sup> c., after the Bulgars invaded this part of the Balkans.

*Southwest Turkey:* decline in cereal cultivation c. 400-700 CE, accompanied by a growth in pine pollen. These are high-elevation yet still agricultural sites in the relatively isolated mountainous areas of Pisidia and Lycia. Local communities went through a period of urban renewal in the earlier centuries of Late Antiquity, but apparently this area experienced decreasing focus on cereal cultivation and forest regrowth (secondary ecological succession) in the later part of Late Antiquity, already in the 5<sup>th</sup> century, similar to north central Turkey (which are also inland sites). This may be partly related to decreasing population numbers, but potentially also to specialization in pastoralism, visible for instance in the area of Sagalassos in southwest Turkey (in the pollen data – not shown here – and in the archaeological record).

#### Fig. 12

We aggregated the data published in Kay (20-21) to reach the results on the right side of the figure and in the left column on the left side of the figure. The data for ‘all plague cemeteries’ aggregates the data for all the cemeteries listed in Keller et al. (22) in which evidence of *Y. pestis* was found, with the earlier finds in Aschheim and Altenerding. Table S2 and Fig. S6 list and map the sites considered in the analysis of the British burial evidence.

### Supplementary Text to aDNA section

#### *Late Antique Y. pestis DNA, Mass Graves and Documented JP Outbreaks*

Three factors largely account for the failure to isolate *Y. pestis* DNA from mass graves and areas where JP large plague outbreaks are documented. First, the approach historically has been access-driven: proximity to and availability of material remains, reasonably well-dated and catalogued, not historical narratives, explains the choice to interrogate material from Aschheim and Alternerding (23-26), from which *Y. pestis* was first reliably isolated using late antique remains, as it does for 16 of 22 sites considered in Keller et al. (22), which are also in Germany, like the labs where nearly all work on JP-era *Y. pestis* has taken place.

Second, most attempts to isolate pre-laboratory *Y. pestis* DNA have been unsuccessful (as 22, 27 stress), despite non-random sampling and a selection bias towards inhumations thought more likely to be plague positive. Nonetheless, we must consider the current positive detection rate an underestimate of the real extent of the pathogen's circulation. False negatives remain a reality for multiple reasons: i) taphonomic limitation of DNA preservation of both host and pathogen DNA in widely differing contexts, ii) substantial septicemic 'load' of *Y. pestis* DNA is required in the pulp cavity of teeth at time of death, and iii) shifting technique sensitivities.

Third, as stressed in the paper, not all mass graves are plague pits. *Y. pestis* did not occur in a vacuum: other epidemics, perhaps pandemics, as well as subsistence crises, affected late antique populations (1, 28-30). Significantly, the remnants of some diseases that could have spread widely at the time (notably RNA viruses) are difficult to detect today (31).

**Fig. S1.** The bronze folles per gold solidus ratio per year. This is a visualization of the raw data from Banaji (12), following Sarris' use of the same dataset to argue for a plague effect (32).

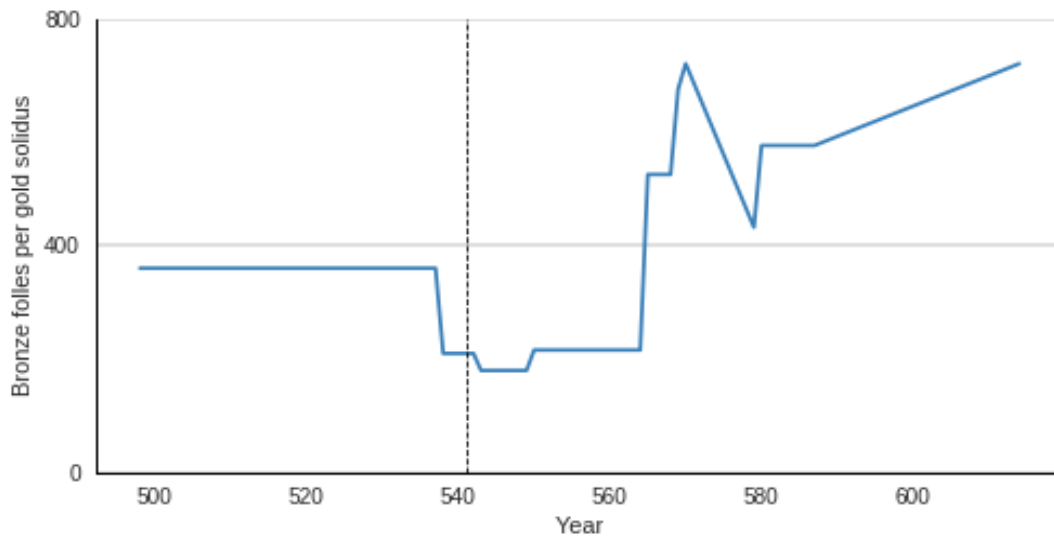

**Fig. S2.** Coins found in Antioch (annual resolution). Analysis begins in 538 CE since that was the date of an imperial monetary reform that changed the size and quantity of coins the state produced (33).

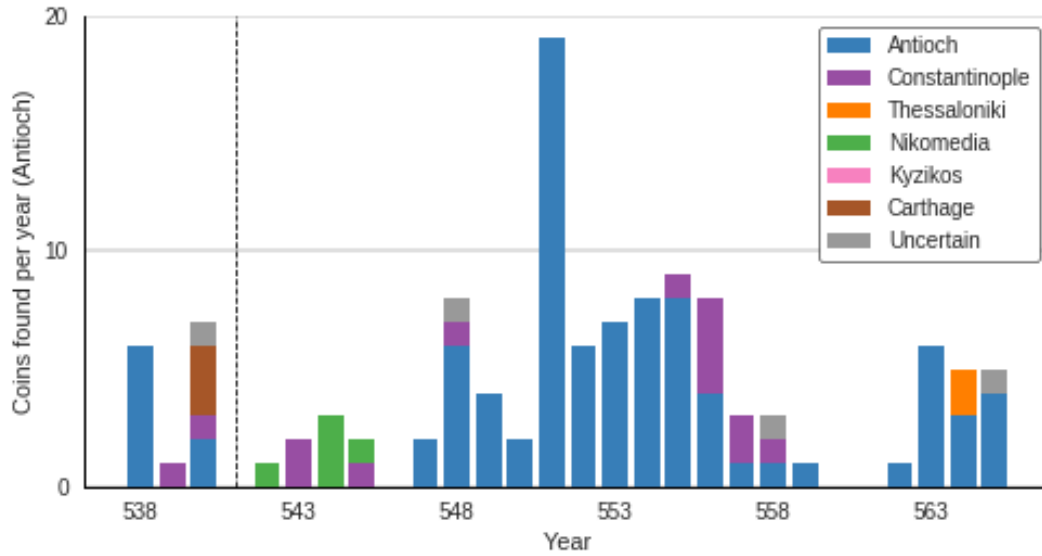



**Fig. S3.** Coins found in Beirut, annual resolution (34).

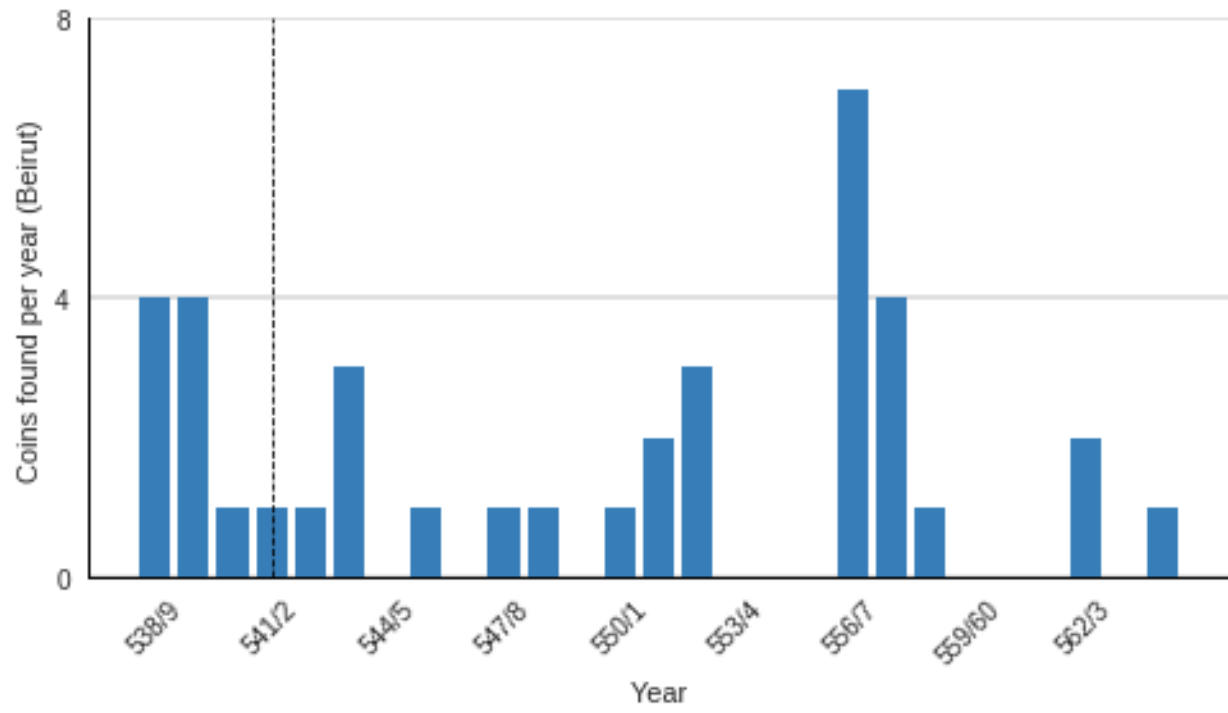

**Fig. S4.** Map of the pollen sites considered in Figs. 10-11.

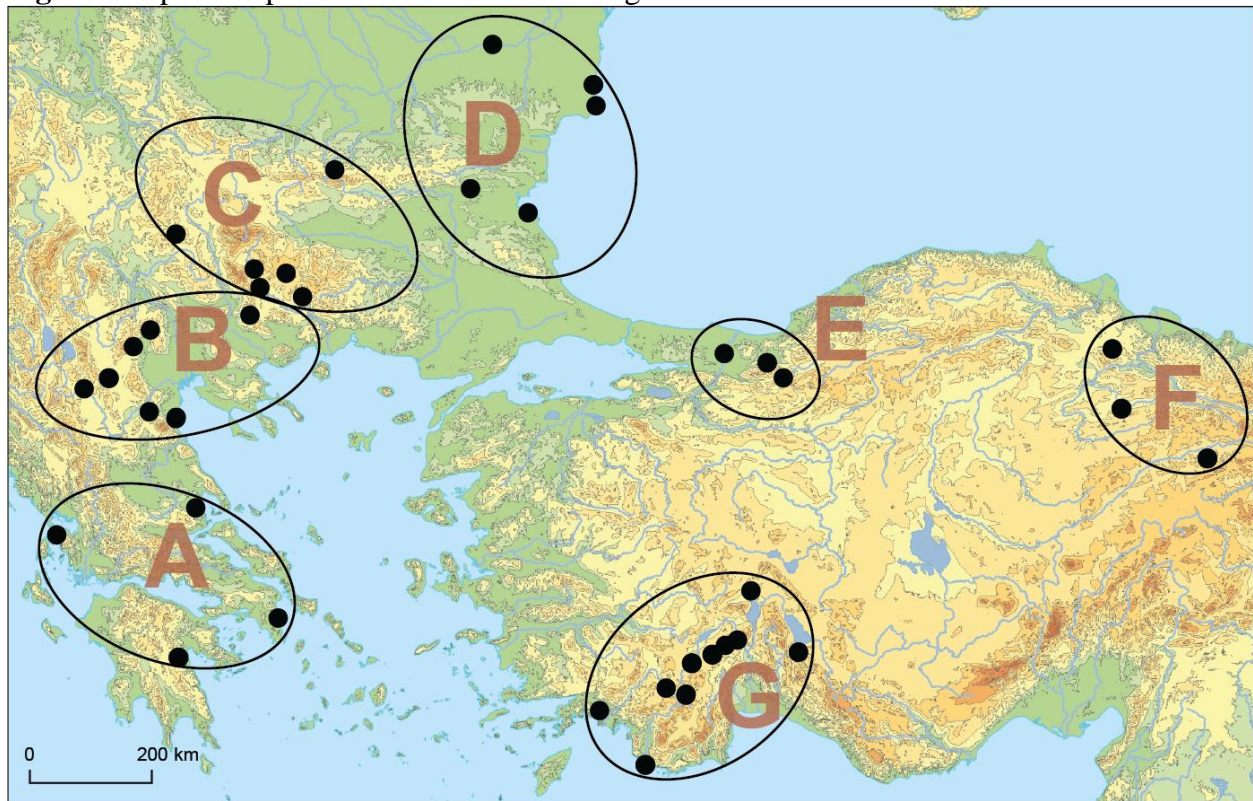

- pollen sites      **A** S Greece   **B** N Greece   **D** E Bulgaria   **F** North central Turkey  
**C** W Bulgaria   **E** NW Turkey   **G** SW Turkey

**Fig. S4a.** Pinus and cerealia pollen in sites in southern Greece.

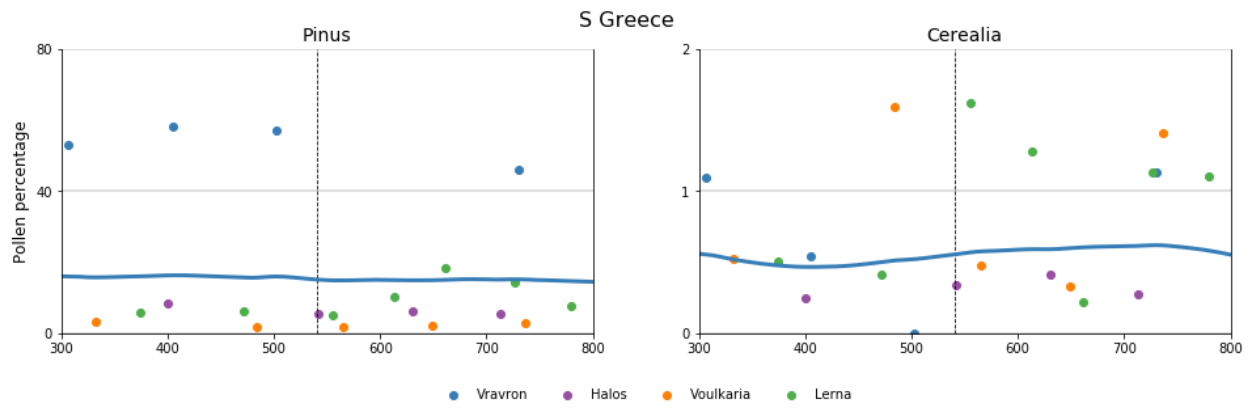

**Fig. S4b.** Pinus and cerealia pollen in sites in northern Greece.

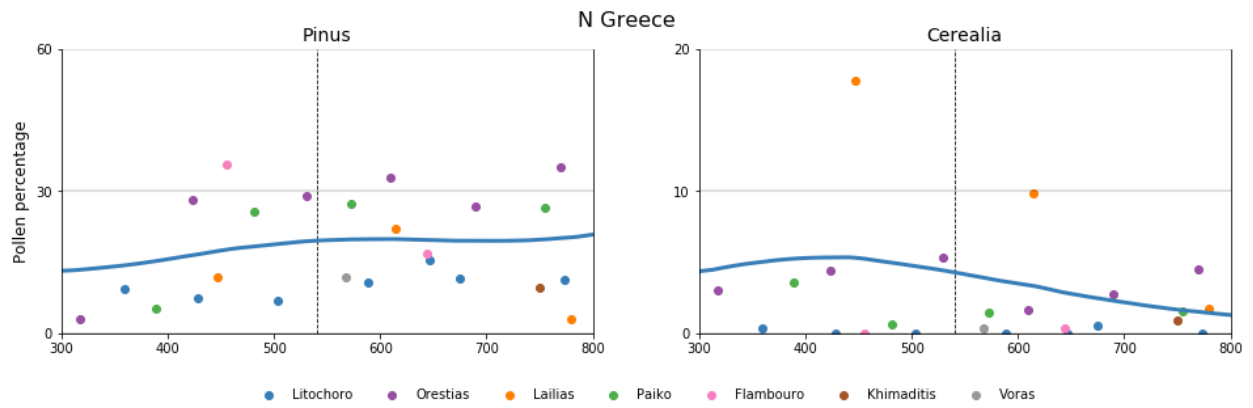

**Fig. S4c.** Pinus and cerealia pollen in sites in west Bulgaria.

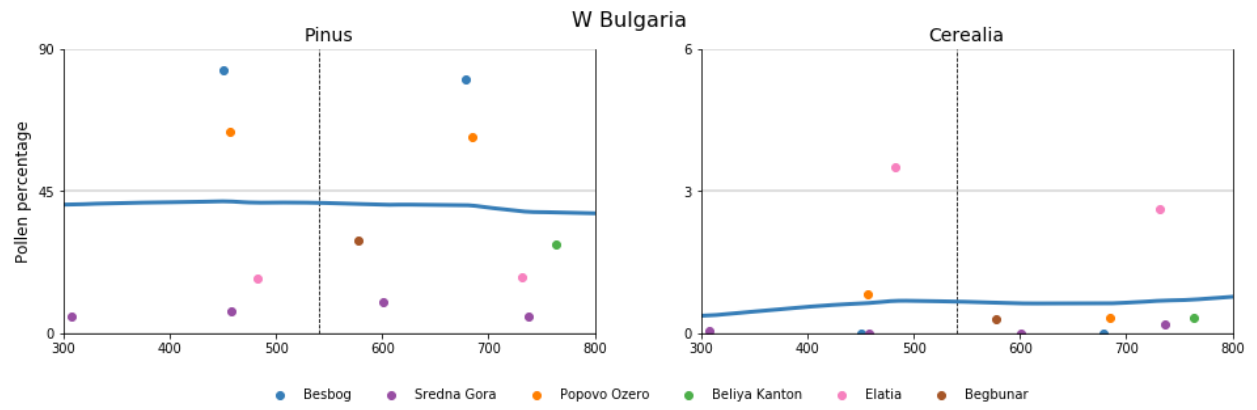

**Fig. S4d.** Pinus and cerealia pollen in sites in east Bulgaria.

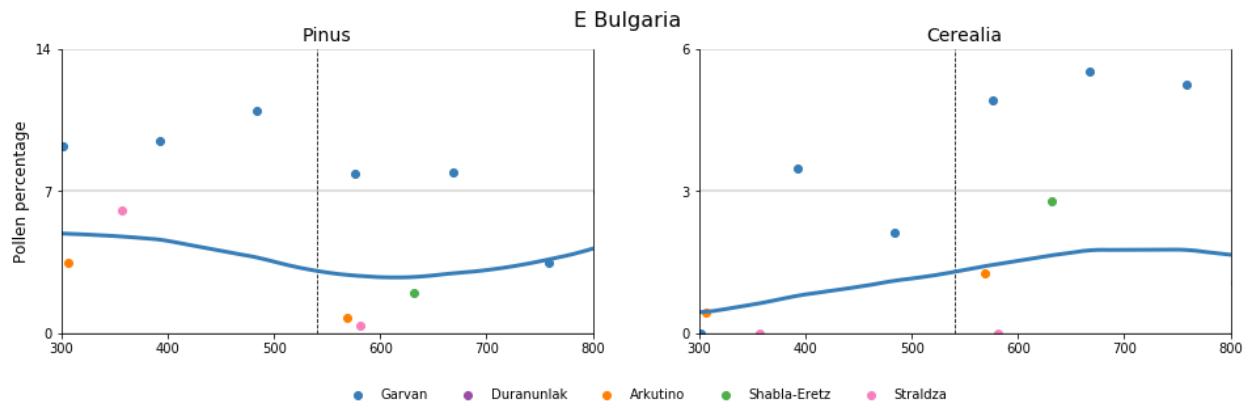

**Fig. S4e.** Pinus and cerealia pollen in sites in northwestern Turkey.

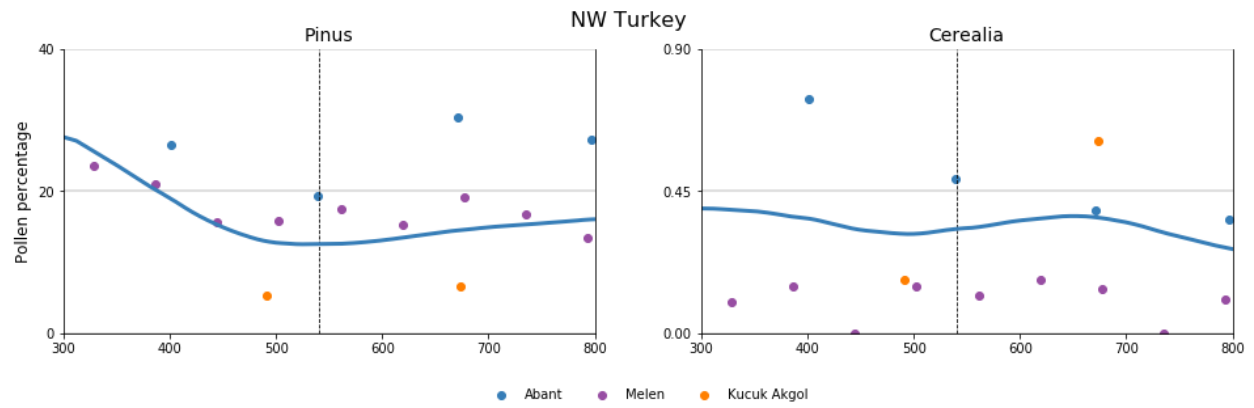

**Fig. S4f.** Pinus and cerealia pollen in sites in north central Turkey.

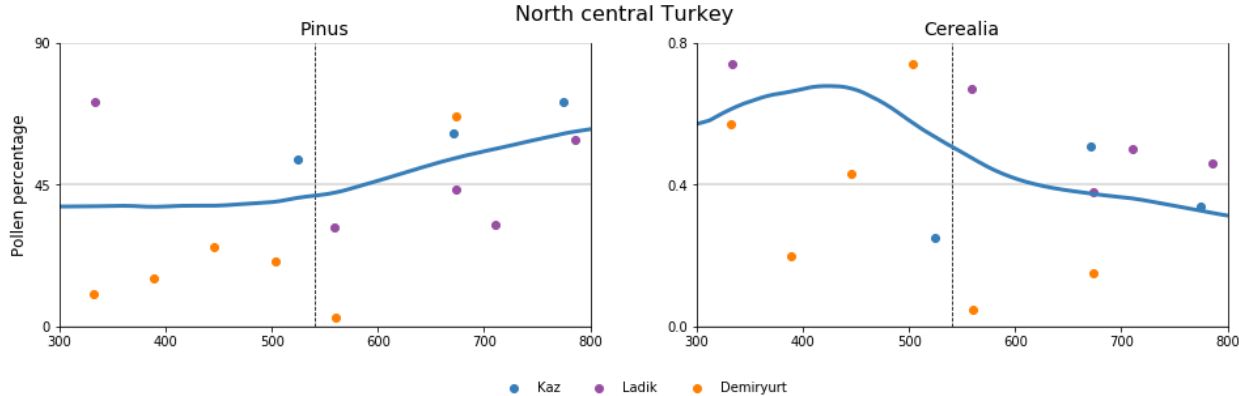



**Fig. S4g.** Pinus and cerealia pollen in sites in southwestern Turkey.

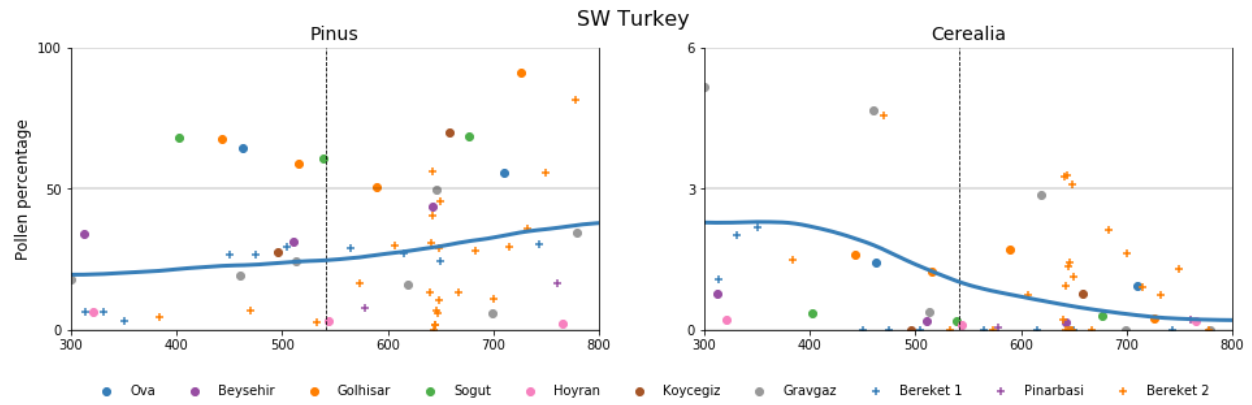

**Fig. S5.** Reconstructed population of the Aschheim settlement based on local burials (35).

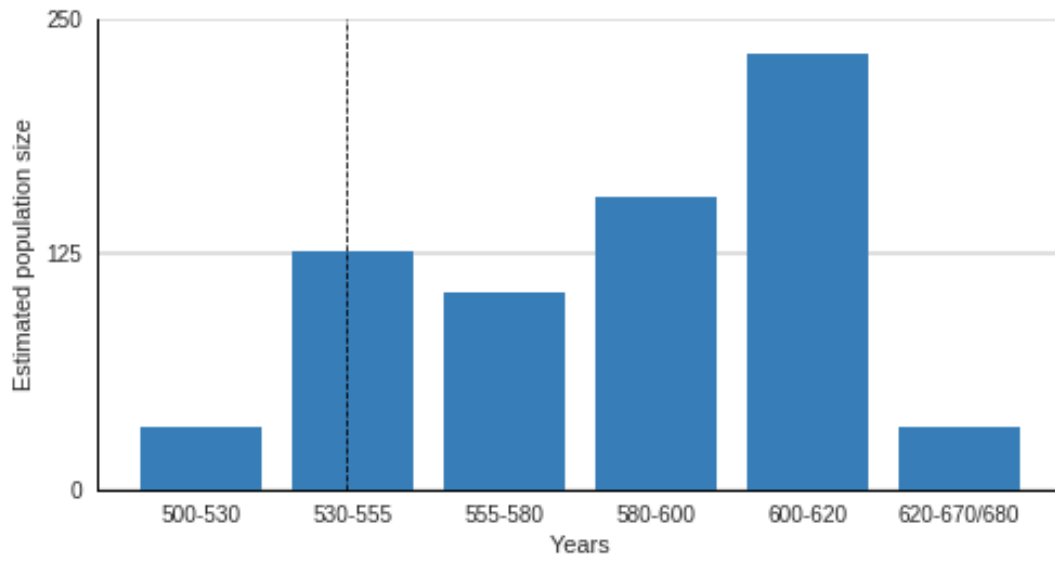

**Fig. S6.** Maps of the British sites considered in this study, organized by periodization.

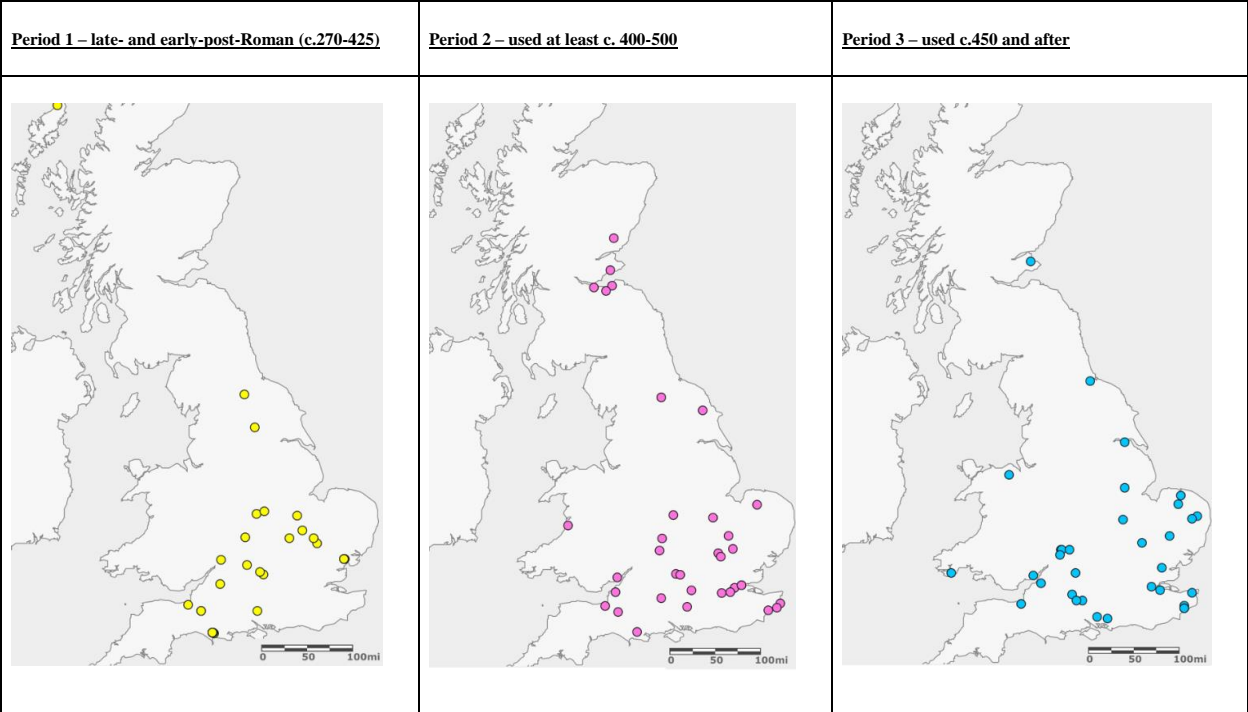

**Table S1.** Published isolations of *Y. pestis* DNA for the Justinianic Plague. See comments on the problems with the 2004, 2005 and 2007 ‘PCR’ studies in the paper.

| Study                      | Location of Sites Tested              | Burial Information                                                                                                                                                                                                                                                  | Material Tested                                                                                                                                                                                                                                     | Number of <i>Y. pestis</i> - Positive Individuals                                                                                      |
|----------------------------|---------------------------------------|---------------------------------------------------------------------------------------------------------------------------------------------------------------------------------------------------------------------------------------------------------------------|-----------------------------------------------------------------------------------------------------------------------------------------------------------------------------------------------------------------------------------------------------|----------------------------------------------------------------------------------------------------------------------------------------|
| Drancourt et al 2004 (36)  | Sens, <b>France</b>                   | Four ‘mass graves’ C <sup>14</sup> -dated to 5 <sup>th</sup> -6 <sup>th</sup> centuries                                                                                                                                                                             | Unclear: 10 teeth from 3 individuals or 19 teeth from 8 individuals                                                                                                                                                                                 | Unclear; <i>Y. pestis</i> detected in ‘one mass grave’                                                                                 |
| Wiechmann, Grupe 2005 (26) | Aschheim, <b>Germany</b>              | Cemetery with 438 individuals (see below); both individuals in one double inhumation tested                                                                                                                                                                         | 2 teeth from individual 166, 4 teeth from individual 167                                                                                                                                                                                            | 1 (individual 167)                                                                                                                     |
| Drancourt et al 2007 (37)  | Vienne, <b>France</b>                 | 12-individual ‘mass grave’ C <sup>14</sup> - (and numismatically) dated to 7 <sup>th</sup> -9 <sup>th</sup> centuries                                                                                                                                               | 18 teeth from 5 skeletons                                                                                                                                                                                                                           | 2                                                                                                                                      |
| Harbeck et al 2013 (24)    | Aschheim, <b>Germany</b>              | Cemetery with 438 individuals (see above); 4 of 8 <i>pla</i> -positive individuals dated archeologically to 530-70, 1 other to 590-630, remaining 3 C <sup>14</sup> -dated to 431-544, 443-566, 435-631                                                             | 2 ‘or more’ teeth from 19 individuals from 12 ‘multiple burials’                                                                                                                                                                                    | <i>pla</i> gene / <i>Y. pestis</i> detected in 8 individuals; individual A120 found <i>Y. pestis</i> -positive in 3 analyses preformed |
| Wagner et al 2014 (25)     | Aschheim, <b>Germany</b>              | Cemetery with 438 individuals (see above); 2 individuals tested C <sup>14</sup> -dated to 443-566 (A76) and 435-631 (A120)                                                                                                                                          | 4 teeth from individual A120, 1 from A76                                                                                                                                                                                                            | 2 (individuals A120, A76), 1 genome                                                                                                    |
| Feldman et al 2016 (23)    | Altenerding, Aschheim, <b>Germany</b> | Altenerding cemetery with ~1,450 individuals (see above), Aschheim with 438 (see above); Altenerding individuals AE1175 and E1176 archeologically dated to 530-70 and C <sup>14</sup> -dated to 426-571; Aschheim individual A120 C <sup>14</sup> -dated to 435-631 | Unspecified number of teeth from 20 individuals from double burials; including 2 teeth each from 2 individuals (AE1175 and AE1176) from a single inhumation; also re-tested individual A120 from Harbeck et al 2013 (24) and Wagner et al 2014 (25) | 2 from Altenerding (AE1175 and AE1176), 1 from Aschheim (A120), 1 genome                                                               |

|                                   |                                                                                                                                                                                                                                                                                                                                                                                                                                                                                                                                   |                                                                                                                                                                                                                                                                                                                                                                                                                                                                                                                                                                                                                                                                                                                                                                                                                                                                                                                                                                                                                                                                                                                          |                                                                                                                                        |                                                                                                                                                                                                                                                                                                                                                                                                                                                                                                                                                                |
|-----------------------------------|-----------------------------------------------------------------------------------------------------------------------------------------------------------------------------------------------------------------------------------------------------------------------------------------------------------------------------------------------------------------------------------------------------------------------------------------------------------------------------------------------------------------------------------|--------------------------------------------------------------------------------------------------------------------------------------------------------------------------------------------------------------------------------------------------------------------------------------------------------------------------------------------------------------------------------------------------------------------------------------------------------------------------------------------------------------------------------------------------------------------------------------------------------------------------------------------------------------------------------------------------------------------------------------------------------------------------------------------------------------------------------------------------------------------------------------------------------------------------------------------------------------------------------------------------------------------------------------------------------------------------------------------------------------------------|----------------------------------------------------------------------------------------------------------------------------------------|----------------------------------------------------------------------------------------------------------------------------------------------------------------------------------------------------------------------------------------------------------------------------------------------------------------------------------------------------------------------------------------------------------------------------------------------------------------------------------------------------------------------------------------------------------------|
| <p>Keller et al<br/>2019 (22)</p> | <p>Leobersdorf, <b>Austria</b>;<br/>Edix Hill, <b>Britain</b>;<br/>Alladorf, Dirlawang,<br/>Dittenheim,<br/>Forchheim,<br/>Grafendobrach,<br/>Kleinlangheim,<br/>Leobersdorf,<br/>München-Aubing,<br/>Neuburg an der<br/>Donau, Peigen,<br/>Petting, Regensburg<br/>Fritz-Fend-Str.,<br/>Sindelsdorf, Straubing<br/>Aziburg I/II,<br/>Unterthürheim,<br/>Waging, Westheim,<br/><b>Germany</b>; Lunel-Viel<br/>Les Horts, Lunel-Viel<br/>Quartier Centrale,<br/>Saint-Doulchard,<br/><b>France</b>; Valencia,<br/><b>Spain</b></p> | <p>8 sites were <i>Y. pestis</i>-positive: Dittenheim cemetery, archeologically dated to 550-700, with 238 graves and 10 cremations, including 4 double inhumations; Edix Hill cemetery, archeologically dated to 500-650, with 115 graves, including 9 double and 1 4-person inhumations; Lunel-Viel Quartier Centrale grave site, archeologically dated to 400-600, including 6 double inhumations in two trenches; Petting cemetery, archeologically dated to 530-730, with 721 graves, including 2 double and possibly 2 triple inhumations; Saint-Doulchard burial trench in early/high medieval cemetery with 175 graves, 48 distinct singular graves in trench, radiocarbon dated to 650-880; Unterthürheim cemetery, archeologically dated to 525-680, 256 graves, including 14 double, 2 triple and 1 4-person inhumations; Valencia cemetery, archeologically dated to 500-700, with 67 graves, including 3 double, 3 triple, 4 4-person, 2 5-person and 15 &gt;5-person inhumations; Waging cemetery, archeological dated to 500-700, with 67 graves, including 2 double and possibly 1 triple inhumation</p> | <p>171 teeth from “a minimum of” 122 individuals from 21 continental sites; 22 additional sequence samples from Edix Hill, Britain</p> | <p>34 <i>pla</i> gene / <i>Y. pestis</i>-positive samples of 191 teeth sampled; 2 classified as outliers/<i>Y. pestis</i> negative. <i>Y. pestis</i>-positive samples, including genomic analysis, Dittenheim (3, including 1 genome), Petting (3, including 1 genome), Unterthürheim (5, including 2 genomes) and Waging (1, including 1 genome), Germany; Valencia (1, including 1 genome), Spain; Lunel-Viel Quartier Centrale (6, including 3 genomes), Saint-Doulchard (11, including 2 genomes), France; Edix Hill (4, including 3 genomes), Britain</p> |
|-----------------------------------|-----------------------------------------------------------------------------------------------------------------------------------------------------------------------------------------------------------------------------------------------------------------------------------------------------------------------------------------------------------------------------------------------------------------------------------------------------------------------------------------------------------------------------------|--------------------------------------------------------------------------------------------------------------------------------------------------------------------------------------------------------------------------------------------------------------------------------------------------------------------------------------------------------------------------------------------------------------------------------------------------------------------------------------------------------------------------------------------------------------------------------------------------------------------------------------------------------------------------------------------------------------------------------------------------------------------------------------------------------------------------------------------------------------------------------------------------------------------------------------------------------------------------------------------------------------------------------------------------------------------------------------------------------------------------|----------------------------------------------------------------------------------------------------------------------------------------|----------------------------------------------------------------------------------------------------------------------------------------------------------------------------------------------------------------------------------------------------------------------------------------------------------------------------------------------------------------------------------------------------------------------------------------------------------------------------------------------------------------------------------------------------------------|

**Table S2.** A list of the British sites considered in the analysis and their periodization.

| <u>Period 1 – late- and early-post-Roman (c.270-425)</u> | <u>Period 2 – used at least c. 400-500</u>   | <u>Period 3 – used c.450 and after</u>       |
|----------------------------------------------------------|----------------------------------------------|----------------------------------------------|
| Alington Ave, Dorchester                                 | 40 Queen St, Herts.                          | Apple Down, West Sussex                      |
| Asthall, Oxon.                                           | Alton, Hamps.                                | Beckford A, Worcs.                           |
| Babraham Hall, Cambs.                                    | Auchterforfar, Angus                         | Beckford B, Worcs.                           |
| Barton Court <i>Infant Cemetery</i> , Oxon.              | Baldock, California, Herts.                  | Bergh Apton, Norfolk                         |
| Bletsoe, Bedfords.                                       | Barton Court (Buildings), Oxon.              | Bishop's Cleeve, Gloucs.                     |
| Bradley Hill <i>Building 3</i> , Som.                    | Berinsfield, Oxon.                           | Blacknall Field, Wilts.                      |
| Bradley Hill <i>North Cemetery</i> , Som.                | Bradley Hill <i>Southern Cemetery</i> , Som. | Broadway Hill, Worcs.                        |
| Cannington (Pd.1 ), Som.                                 | Buckland, Dover, Kent                        | Butler's Field, Gloucs.                      |
| Catterick Bridge, N. Yorks.                              | Caerwent (Vicarage Orchard), Mon.            | Caerwent (Pipeline), Mon.                    |
| Maldon Road, Colchester, Essex                           | Cannington (Pd. 2), Som.                     | Cannington (Pd. 3). Som.                     |
| St Johns, Colchester, Essex                              | Catstane, Midlothian                         | Castledyke South, Sheffield                  |
| Butt Road (Site Ph. 1), Colchester, Essex                | Catt. (Bainesse SSD 1), N. Yorks.            | Cuxton, Kent                                 |
| Butt Road (Site Ph. 2), Colchester, Essex                | Catt. (Bainesse SSD 10), N. Yorks.           | Darenth Park, Kent                           |
| Galson, Lewis                                            | Collingbourne Ducis, Wilts.                  | Droxford, Hamps.                             |
| Jesus Lane, Cambridge                                    | Four Winds, Midlothian                       | Edix Hill, Barrington A, Cambs.              |
| Lankhills, Hamps.                                        | Great Chesterford, Essex                     | Glaphorn Rd, Northants.                      |
| Little Keep, Dorchester                                  | Henley Wood, Som.                            | Gunthorpe, Cambs.                            |
| Lynch Farm, Cambs.                                       | Lundin Links, Fife                           | Hallow Hill, Fife                            |
| Nettleton, Wilts.                                        | Mill Hill, Kent                              | HP, Filton, S. Gloucs.                       |
| Newarke St, Leicester                                    | Minerva, Cambs.                              | Lyminge, Kent                                |
| Old Vicarage, Ford., Dorchester                          | Mucking (AS I), Essex                        | Monkton, Kent                                |
| Poundbury <i>Main</i> , Dorchester                       | Mucking (AS II), Essex                       | Morning Thorpe, Norfolk                      |
| Poundbury <i>East</i> , Dorchester                       | Oakington, Cambs.                            | Norton, N. Yorks.                            |
| Poundbury <i>North</i> , Dorchester                      | Orpington, Kent                              | Porthclew, Pembs.                            |
| Poundbury <i>Site C</i> , Dorchester                     | Park Lane, Croydon, Kent                     | Portway, Andover, Hamps.                     |
| Poundbury <i>Outlying</i> , Dorchester                   | Plas Gogerddan, Cardiganshire                | Quarrington, Lincolns.                       |
| Queenford Farm, Oxon.                                    | Salt. Tunnel <i>East</i> , Kent              | Saltwood Tunnel <i>Central (West)</i> , Kent |
| Radley Barrows, Oxon.                                    | Stretton-on-Fosse, Warks.                    | Saltwood Tunnel <i>West</i> , Kent           |
| Tubney Wood (Pd. 1), Oxon.                               | Temple Hill, Dartford, Kent                  | Spong Hill, Norfolk                          |
| Wasperton (Pd. 1), Warks.                                | Thornybank, Midlothian                       | Springfield Lyons, Essex                     |
| Watersmeet, Hunts.                                       | Tittleshall, Norfolk                         | Tandderwen, North Wales                      |
| Wattle Syke, N. Yorks.                                   | Tolpuddle Ball, Dorset                       | Watchfield, Oxon.                            |
| Wotton Cemetery, Gloucester                              | Tubney Wood (Pd. 2), Oxon.                   | Westgarth Gardens, Suffolk                   |

Wasperton (Pd. 2), Warks.

West Heslerton, N. Yorks.

West Overton, Wilts.

## SI References:

1. Stathakopoulos DC (2004) *Famine and Pestilence in the Late Roman and Early Byzantine Empire: A Systematic Survey of Subsistence Crises and Epidemics* (Ashgate, Aldershot).
2. TLG (Thesaurus Linguae Graecae) (2019), (<http://stephanus.tlg.uci.edu/>). Accessed 15 October 2019.
3. Dekkers E (1995) *Clavis Patrum Latinorum* (Steenbrugis: In Abbatia Sancti Petri, Ed. tertia aucta et emendata).
4. Blume FH (2019) Annotated Justinian Code (<http://www.uwyo.edu/lawlib/blume-justinian/ajc-edition-2/novels/index.html>). Accessed 15 October 2019.
5. Noailles P (1912), *Les collections de nouvelles de l'empereur Justinien* (Recueil Sirey, Paris).
6. Miller D, Sarris P eds. (2018), *The Novels of Justinian: A Complete Annotated English Translation* (New York, Cambridge University Press)
7. Arjava A (1996), *Women and Law in Late Antiquity* (New York, Oxford University Press).
8. Lambertini R (1977), *I caratteri della novella 118 di Giustiniano* (Milan, A. Giuffrè).
9. Hillner J (2015), *Prison, Punishment and Penance in Late Antiquity* (Cambridge, Cambridge University Press).
10. Papyri.info (2019), (<http://papyri.info/>). Accessed 15 October 2019.
11. Papaconstantinou A (2012), "Egypt." In *The Oxford Handbook of Late Antiquity* (ed. Fitzgerald JS), 195-223.
12. Banaji J (1992) *Rural Communities in the Late Empire - Economic and Monetary Aspects*. Thesis, University of Oxford, Oxford.
13. Mazza R (2001) *L'Archivio degli Apioni : terra, lavoro e proprietà senatoria nell'Egitto tardoantico* (Bari: Edipuglia).
14. PHI Greek Inscriptions (2019), (<https://inscriptions.packhum.org/>). Accessed 15 October 2019.

15. Epigraphic Database Heidelberg (2019), (<https://edh-www.adw.uni-heidelberg.de/home>). Accessed 15 October 2019.
16. EDCS (Epigrafik-Datenbank Clauss-Slaby) (2019), (<http://www.manfredclauss.de/>). Accessed 15 October 2019.
17. EDB (Epigraphic Database Bari): Inscriptions by Christians in Rome (3rd-8th cent. CE) (2019), (<http://www.edb.uniba.it/>). Accessed 15 October 2019.
18. HE - HispaniaEpigraphica Online Database (2019), (<http://eda-bea.es/>). Accessed 15 October 2019.
19. Izdebski A, Koloch G, Słoczyński T (2015), Exploring Byzantine and Ottoman economic history with the use of palynological data: a quantitative approach. *Jahrbuch der Österreichischen Byzantinistik* 65.
20. Kay JE (2016) Children's burials in fifth-century Britain and connections to the Roman past. *Childhood in the Past* 9, 86–108.
21. Kay JE (2017) Old, New, Borrowed, and Buried: Burial Practices in Fifth-Century Britain, 350-550 CE. Thesis, Boston College, Chestnut Hill, M.A.
22. Keller M, et al. (2019), Ancient *Yersinia pestis* genomes from across Western Europe reveal early diversification during the First Pandemic (541-750). *PNAS* 116(25), 12363-12372.
23. Feldman M, et al. (2016) A high-coverage *Yersinia pestis* genome from a sixth-century Justinianic Plague victim. *Mol Biol Evol* 33, 2911–2923.
24. Harbeck M, et al. (2013) *Yersinia pestis* DNA from skeletal remains from the 6th century AD reveals insights into Justinianic Plague. *PLOS Pathogens* 9, e1003349.
25. Wagner DM, et al. (2014) *Yersinia pestis* and the plague of Justinian 541-543 AD: a genomic analysis. *Lancet Infect Dis* 14, 319–326.
26. Wiechmann I, Grupe G (2005) Detection of *Yersinia pestis* DNA in two early medieval skeletal finds from Aschheim (Upper Bavaria, 6th century A.D.). *Am J Phys Anthropol* 126, 48–55.
27. Schuenemann VJ, et al. (2011) Targeted enrichment of ancient pathogens yielding the pPCP1 plasmid of *Yersinia pestis* from victims of the Black Death. *PNAS* 108, E746–E752.
28. Bonser W (1963) *The Medical Background of Anglo-Saxon England: A Study in History, Psychology, and Folklore* (London: Wellcome Historical Medical Library).
29. Newfield TP (2018) Mysterious and Mortiferous Clouds: The Climate Cooling and Disease Burden of Late Antiquity. *Late Antique Archaeology* 12(1), 271-297.



30. Newfield TP (2017), Malaria and malaria-like disease in the early Middle Ages. *Early Medieval Europe* 25, 251–300.
31. Marciniak S, Poinar H (2018) Ancient pathogens through human history: A paleogenomic perspective. *Paleogenomics*, eds Lindqvist C, Rajora O (New York: Springer), pp. 115–138.
32. Sarris P (2002) The Justinianic plague: origins and effects. *Continuity and Change* 17, 169–182.
33. Waage DB (1952) *Antioch-on-the-Orontes IV, pt. 2: Greek, Roman, Byzantine and Crusaders' coins* (Princeton: Princeton University Press).
34. Abou Diwan G (2018) Base-metal coinage circulation in Byzantine Beirut 491-641 CE. *American Journal of Numismatics* 30, 163–218.
35. Staskiewicz A (2007) The early medieval cemetery at Aschheim-Bajuwarenring - a Merovingian population under the influence of pestilence?. Skeletal series and their socio-economic context, ed. Grupe G (Leidorf, Rahden, Westf), pp. 35–56.
36. Drancourt M, et al. (2004) Genotyping, Orientalis-like *Yersinia pestis*, and plague pandemics. *Emerging Infectious Diseases* 10, 1585–1592.
37. Drancourt M, et al. (2007) *Yersinia pestis* Orientalis in remains of ancient plague patients. *Emerging Infectious Diseases* 13, 332–333.
